# Supplementary material
Source: PubMed Central journal article supplement (PMC9394925)

# Regional plot of cg00676801

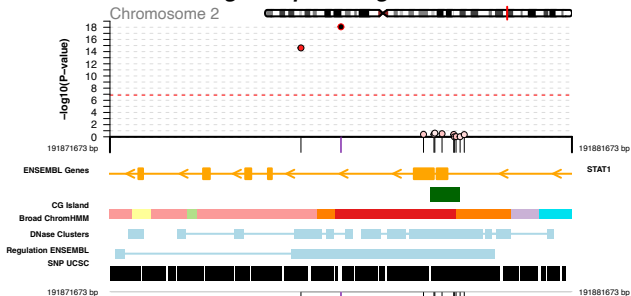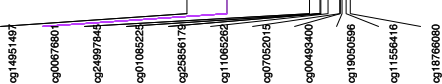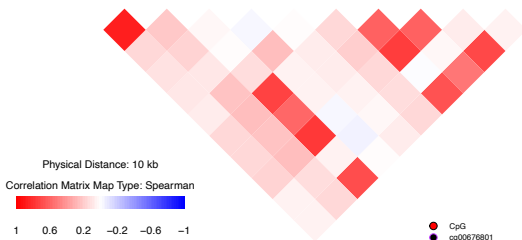

# Regional plot of cg03038262

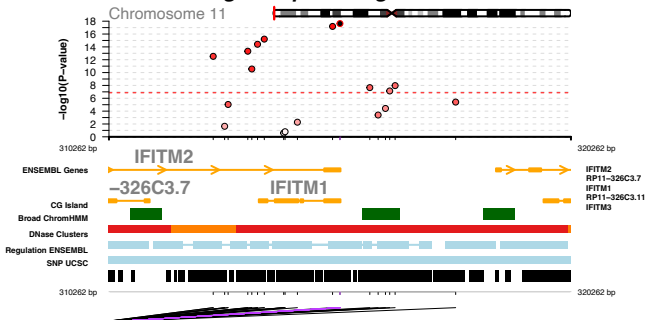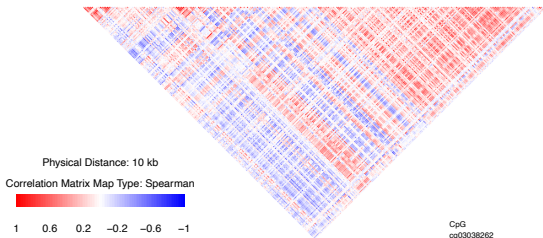

# Regional plot of cg22862003

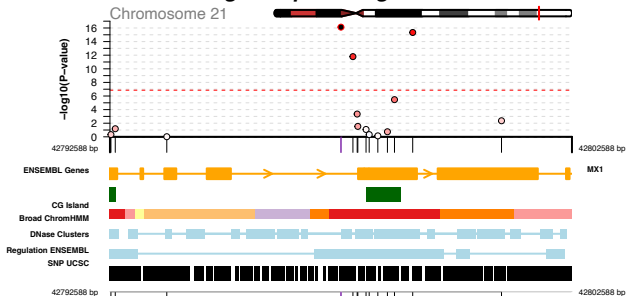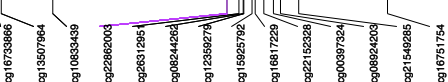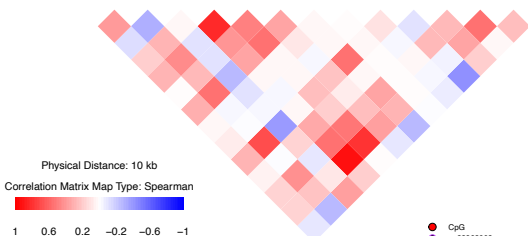

# Regional plot of cg08122652

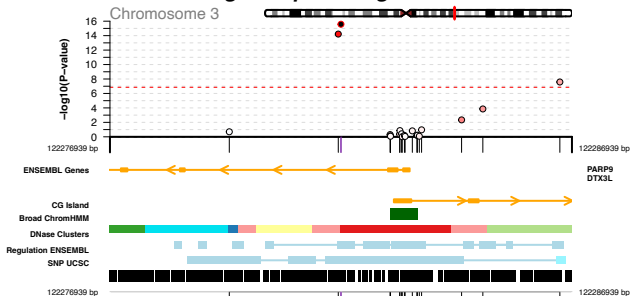

cg07312661  
 cg22830808  
 cg08122652  
 cg07916070  
 cg19270098  
 cg17604387  
 cg18715297  
 cg11138794  
 cg04154825  
 cg12101558  
 cg07377586  
 cg01678062  
 cg10668555  
 cg04741636  
 cg21464278  
 cg27291138  
 cg09407339  
 cg00633969  
 cg14098385  
 cg02519879

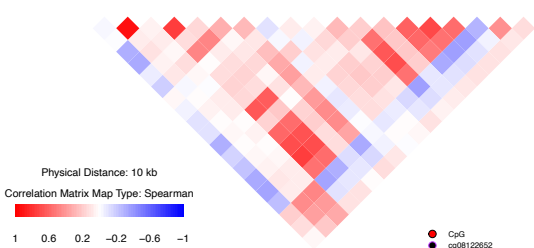

# Regional plot of cg07839457

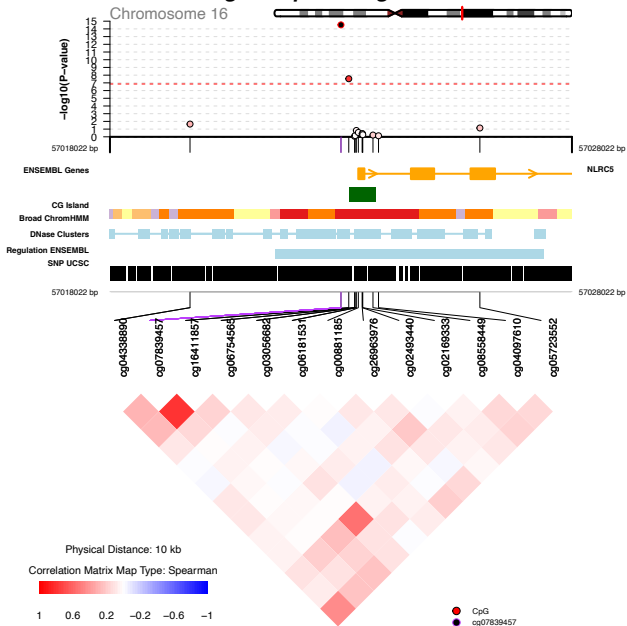

# Regional plot of cg03607951

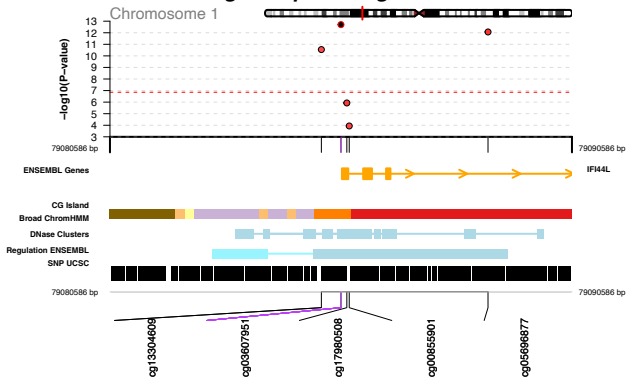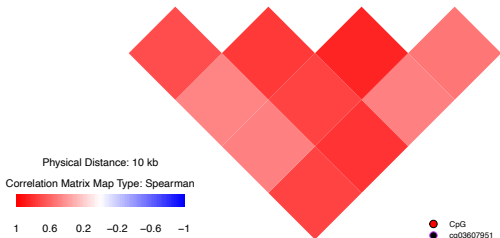

# Regional plot of cg18533225

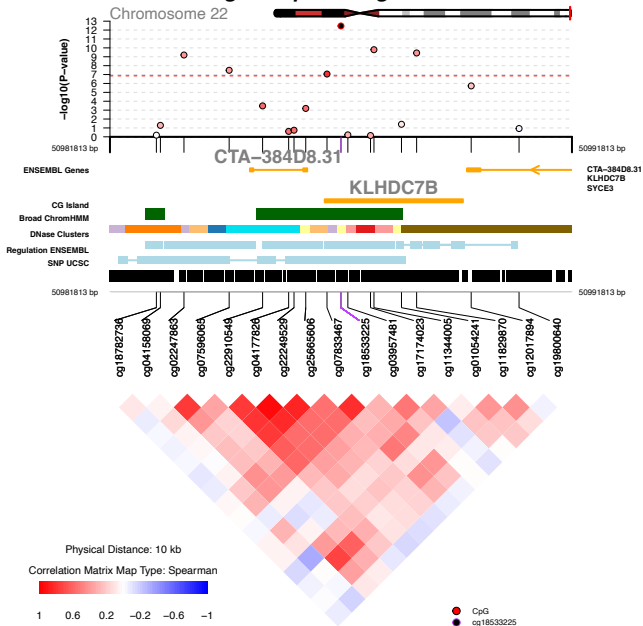

# Regional plot of cg08926253

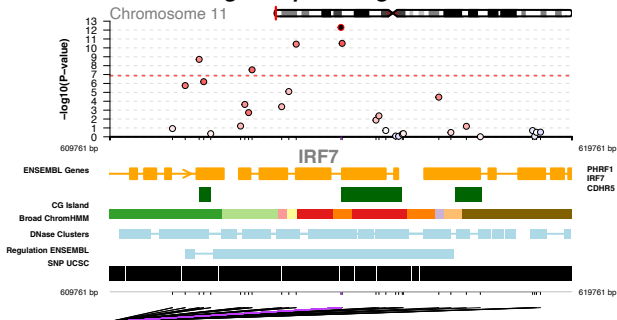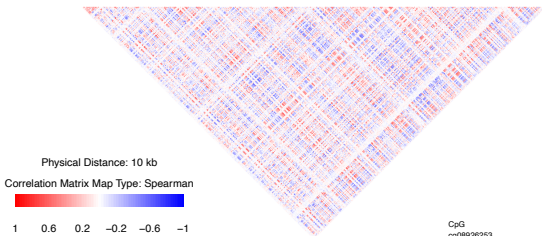



# Regional plot of cg14750551

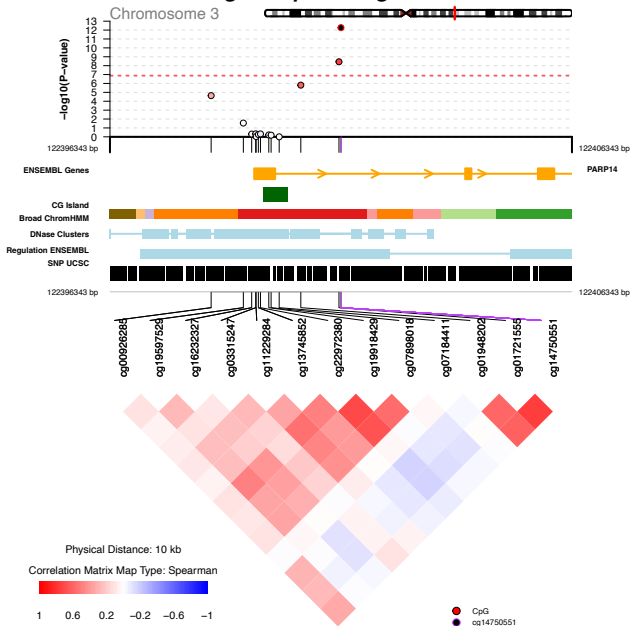

# Regional plot of cg11702942

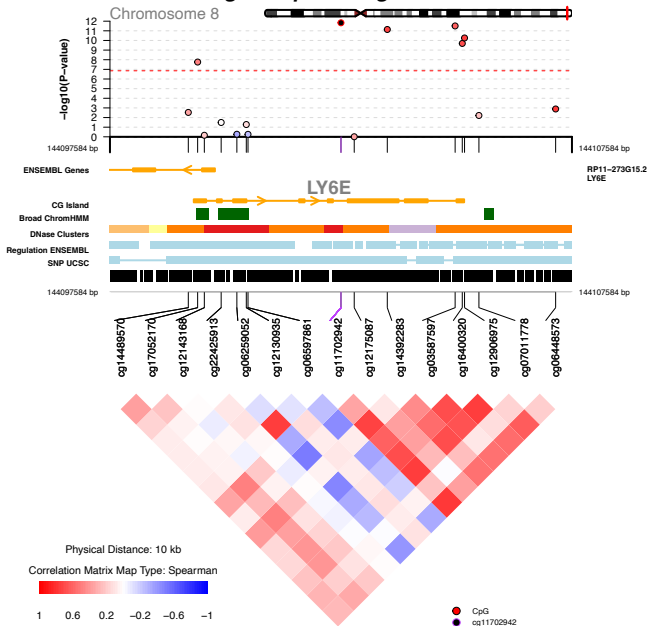

# Regional plot of cg07285983

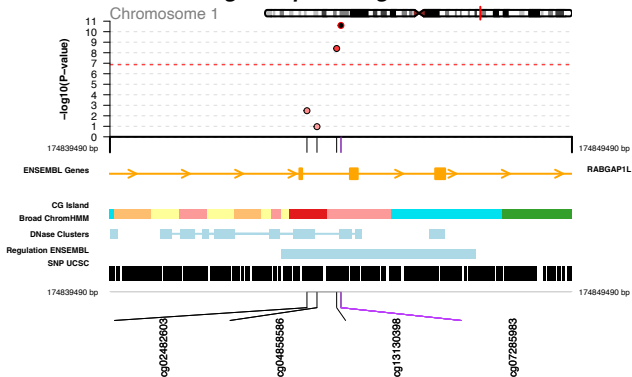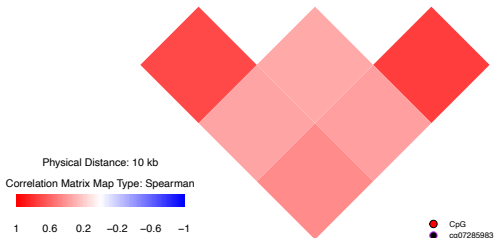

# Regional plot of cg00533183

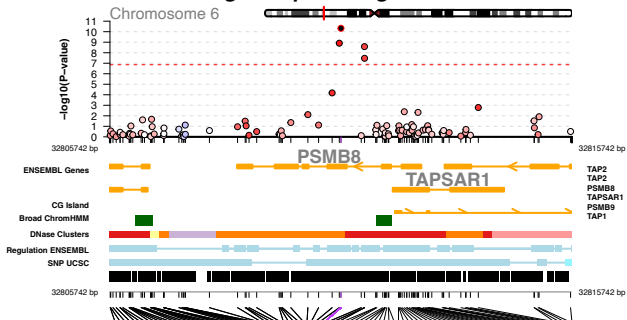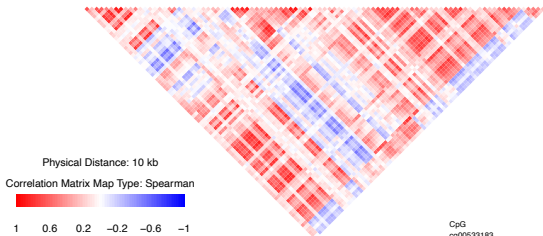

# Regional plot of cg08122652



cg07312661  
cg22930808  
cg08122652  
cg07916070  
cg19270098  
cg17604387  
cg18715297  
cg11138794  
cg04154825  
cg12101558  
cg07377586  
cg01678062  
cg10668555  
cg04741636  
cg21464278  
cg27291138  
cg09407339  
cg00633969  
cg14098385  
cg02519879



# Regional plot of cg04788999

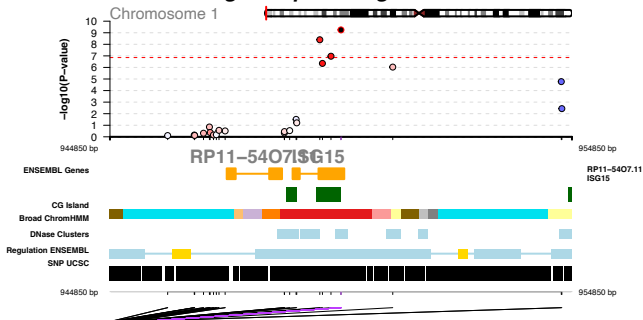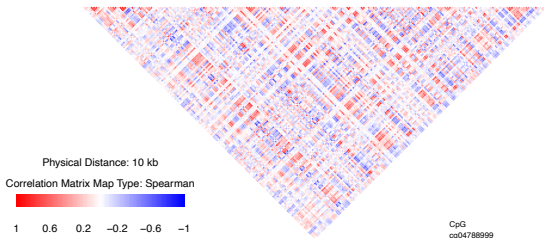

# Regional plot of cg04927537

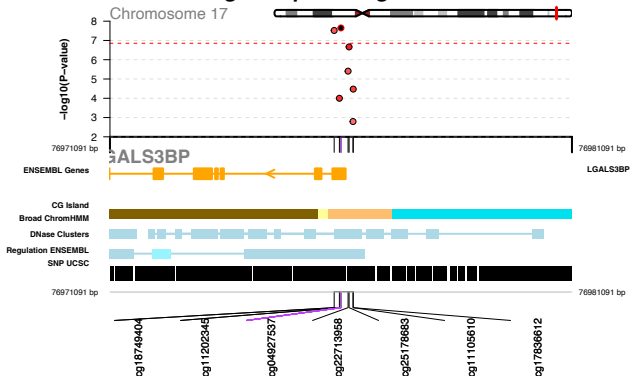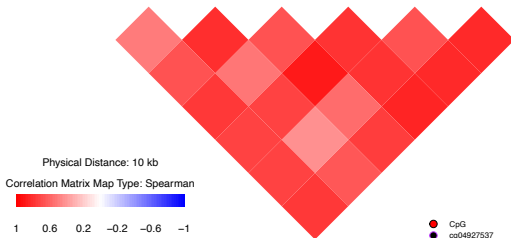

Supplement: NIHMS1812309-supplement-Supplemental_Figures_-_Regional_Plots.pdf [file NIHMS1812309-supplement-Supplemental_Figures_-_Regional_Plots.pdf]
